# Supplementary material for: Definitive Local Therapy Is Associated with Improved Survival in Metastatic Soft Tissue Sarcomas
Source: PubMed Central journal article supplement (PMC7956624; doi:10.3390/cancers13050932), 2021-02-24
Supplement: cancers-13-00932-s001.pdf [file cancers-13-00932-s001.pdf]

**Supplementary Materials:**
**Supplemental Table 1:** Baseline characteristics of patient cohort.

| <b>Receipt of local therapy</b> | <b>No</b> | <b>%</b> | <b>Yes</b> | <b>%</b> | <b>Total</b> | <b>%</b> | <b><math>\chi^2</math></b> |
|---------------------------------|-----------|----------|------------|----------|--------------|----------|----------------------------|
| <b>Total, n</b>                 | 2,466     | 59       | 1,714      | 41       | 4,180        | 100      |                            |
| <b>Age</b>                      |           |          |            |          |              |          | <0.001                     |
| <70 years                       | 1,967     | 80       | 1,443      | 84       | 3,410        | 82       |                            |
| ≥70 years                       | 499       | 20       | 271        | 16       | 770          | 18       |                            |
| <b>Gender</b>                   |           |          |            |          |              |          | 0.853                      |
| Male                            | 1,351     | 55       | 944        | 55       | 2,295        | 55       |                            |
| Female                          | 1,115     | 45       | 770        | 45       | 1,885        | 45       |                            |
| <b>Race</b>                     |           |          |            |          |              |          | 0.736                      |
| Non-Hispanic White              | 1,761     | 71       | 1,250      | 73       | 3,011        | 72       |                            |
| Non-Hispanic Black              | 381       | 15       | 246        | 14       | 627          | 15       |                            |
| Hispanic                        | 208       | 8        | 140        | 8        | 348          | 8        |                            |
| Other                           | 116       | 5        | 78         | 5        | 194          | 5        |                            |
| <b>Facility Area</b>            |           |          |            |          |              |          | 0.649                      |
| Metropolitan                    | 2,009     | 81       | 1,413      | 82       | 3,422        | 82       |                            |
| Urban                           | 317       | 13       | 216        | 13       | 533          | 13       |                            |
| Rural                           | 46        | 2        | 24         | 1        | 70           | 2        |                            |
| Unknown                         | 94        | 4        | 61         | 4        | 155          | 4        |                            |
| <b>Insurance</b>                |           |          |            |          |              |          | <0.001                     |
| Commercial                      | 1,203     | 49       | 935        | 55       | 2,138        | 51       |                            |
| Medicare                        | 760       | 31       | 422        | 25       | 1,182        | 28       |                            |
| Medicaid                        | 272       | 11       | 218        | 13       | 490          | 12       |                            |
| Uninsured                       | 157       | 6        | 91         | 5        | 248          | 6        |                            |
| Other                           | 74        | 3        | 48         | 3        | 122          | 3        |                            |



|                               |       |    |       |    |       |    |        |
|-------------------------------|-------|----|-------|----|-------|----|--------|
| 0                             | 2,001 | 81 | 1,419 | 83 | 3,420 | 82 |        |
| 1                             | 365   | 15 | 235   | 14 | 600   | 14 |        |
| 2                             | 75    | 3  | 50    | 3  | 125   | 3  |        |
| 3                             | 25    | 1  | 10    | 1  | 35    | 1  |        |
| <b>Primary Site</b>           |       |    |       |    |       |    | <0.001 |
| Head and Neck                 | 72    | 3  | 77    | 4  | 149   | 4  |        |
| Extremity                     | 693   | 28 | 842   | 49 | 1,535 | 37 |        |
| Thorax                        | 318   | 13 | 193   | 11 | 511   | 12 |        |
| Abdomen/Pelvis                | 955   | 39 | 508   | 30 | 1,463 | 35 |        |
| Other/NOS                     | 428   | 17 | 94    | 5  | 522   | 12 |        |
| <b>Histology</b>              |       |    |       |    |       |    | <0.001 |
| Unclassified                  | 1,051 | 43 | 682   | 40 | 1,733 | 41 |        |
| Undifferentiated Pleomorphic  | 90    | 4  | 101   | 6  | 191   | 5  |        |
| Fibrosarcoma/Myxofibrosarcoma | 62    | 3  | 85    | 5  | 147   | 4  |        |
| Liposarcoma                   | 162   | 7  | 149   | 9  | 311   | 7  |        |
| Leiomyosarcoma                | 626   | 25 | 316   | 18 | 942   | 23 |        |
| Synovial Sarcoma              | 165   | 7  | 194   | 11 | 359   | 9  |        |
| Angiosarcoma                  | 235   | 10 | 100   | 6  | 335   | 8  |        |
| MPNST                         | 75    | 3  | 87    | 5  | 162   | 4  |        |
| <b>Grade</b>                  |       |    |       |    |       |    | <0.001 |
| I                             | 41    | 2  | 32    | 2  | 73    | 2  |        |
| II                            | 114   | 5  | 104   | 6  | 218   | 5  |        |
| III                           | 1,071 | 43 | 1,060 | 62 | 2,131 | 51 |        |
| Unknown                       | 1,240 | 50 | 518   | 30 | 1,758 | 42 |        |
| <b>Tumor Size</b>             |       |    |       |    |       |    | <0.001 |
| <5 cm                         | 225   | 9  | 207   | 12 | 432   | 10 |        |
| 5.1-10 cm                     | 547   | 22 | 473   | 28 | 1,020 | 24 |        |

|                          |       |    |     |    |       |    |       |
|--------------------------|-------|----|-----|----|-------|----|-------|
| 10.1-15 cm               | 414   | 17 | 385 | 22 | 799   | 19 |       |
| >15 cm                   | 452   | 18 | 399 | 23 | 851   | 20 |       |
| Unknown                  | 828   | 34 | 250 | 15 | 1,078 | 26 |       |
| <b>Year of Diagnosis</b> |       |    |     |    |       |    | 0.064 |
| 2004-2007                | 477   | 19 | 358 | 21 | 835   | 20 |       |
| 2008-2011                | 837   | 34 | 618 | 36 | 1,455 | 35 |       |
| 2012-2015                | 1,152 | 47 | 738 | 43 | 1,890 | 45 |       |

**Supplemental Table 2:** Factors associated with receipt of surgery as definitive local treatment.

| Receipt of surgery       | Univariate Analysis |         | Multivariate Analysis |         |
|--------------------------|---------------------|---------|-----------------------|---------|
|                          | OR (95% CI)         | P value | OR (95% CI)           | P value |
| <b>Age</b>               |                     |         |                       |         |
| <70 years                | 1                   |         | 1                     |         |
| ≥70 years                | 0.65 (0.53-0.79)    | <0.001  | 0.75 (0.58-0.97)      | 0.026   |
| <b>Gender</b>            |                     |         |                       |         |
| Male                     | 1                   |         | ---                   | ---     |
| Female                   | 1.07 (0.93-1.23)    | 0.355   | ---                   | ---     |
| <b>Race</b>              |                     |         |                       |         |
| Non-Hispanic White       | 1                   |         | ---                   | ---     |
| Non-Hispanic Black       | 0.92 (0.75-1.13)    | 0.445   | ---                   | ---     |
| Hispanic                 | 1.04 (0.81-1.35)    | 0.741   | ---                   | ---     |
| Other                    | 0.96 (0.68-1.36)    | 0.821   | ---                   | ---     |
| <b>Facility Area</b>     |                     |         |                       |         |
| Metropolitan             | 1                   |         | ---                   | ---     |
| Urban                    | 0.90 (0.73-1.12)    | 0.365   | ---                   | ---     |
| Rural                    | 1.02 (0.59-1.77)    | 0.945   | ---                   | ---     |
| Unknown                  | 1.03 (0.71-1.50)    | 0.868   | ---                   | ---     |
| <b>Facility Location</b> |                     |         |                       |         |

|                                       |                  |        |  |                  |       |
|---------------------------------------|------------------|--------|--|------------------|-------|
| East                                  | 1                |        |  | 1                |       |
| South                                 | 1.01 (0.81-1.25) | 0.962  |  | 1.09 (0.85-1.38) | 0.501 |
| Central                               | 0.89 (0.71-1.13) | 0.348  |  | 0.90 (0.70-1.16) | 0.414 |
| West                                  | 1.16 (0.89-1.50) | 0.280  |  | 1.22 (0.92-1.62) | 0.158 |
| Unknown                               | 1.22 (0.96-1.53) | 0.101  |  | 1.22 (0.90-1.65) | 0.202 |
| <b>Facility Type</b>                  |                  |        |  |                  |       |
| Non-Academic                          | 1                |        |  | 1                |       |
| Academic                              | 1.38 (1.17-1.62) | <0.001 |  | 1.21 (1.01-1.45) | 0.037 |
| Unknown                               | 1.45 (1.19-1.76) | <0.001 |  | .                | .     |
| <b>Insurance</b>                      |                  |        |  |                  |       |
| Commercial                            | 1                |        |  | 1                |       |
| Medicare                              | 0.69 (0.58-0.83) | <0.001 |  | 0.82 (0.66-1.02) | 0.079 |
| Medicaid                              | 1.12 (0.90-1.40) | 0.313  |  | 1.03 (0.82-1.31) | 0.778 |
| Uninsured                             | 0.77 (0.56-1.07) | 0.117  |  | 0.74 (0.53-1.04) | 0.084 |
| Other                                 | 0.99 (0.65-1.51) | 0.975  |  | 1.01 (0.65-1.57) | 0.953 |
| <b>Distance to Treatment Facility</b> |                  |        |  |                  |       |
| ≤40 miles                             | 1                |        |  | 1                |       |
| >40 miles                             | 1.33 (1.13-1.57) | 0.001  |  | 1.11 (0.92-1.32) | 0.274 |
| Unknown                               | 0.99 (0.55-1.77) | 0.973  |  | 0.79 (0.43-1.45) | 0.451 |
| <b>Zip Code Education Level</b>       |                  |        |  |                  |       |
| ≥21%                                  | 1                |        |  | ---              | ---   |
| 13%-20.9%                             | 1.07 (0.86-1.34) | 0.517  |  | ---              | ---   |
| 7%-12.9%                              | 1.09 (0.88-1.34) | 0.429  |  | ---              | ---   |
| <7%                                   | 0.99 (0.79-1.24) | 0.951  |  | ---              | ---   |
| Unknown                               | 1.03 (0.58-1.85) | 0.913  |  | ---              | ---   |
| <b>Zip Code Income Level</b>          |                  |        |  |                  |       |
| <38,000                               | 1                |        |  | ---              | ---   |
| 38,000-47,999                         | 1.08 (0.86-1.35) | 0.522  |  | ---              | ---   |

|                               |                  |        |  |                  |        |
|-------------------------------|------------------|--------|--|------------------|--------|
| 48,000-62,999                 | 1.07 (0.86-1.33) | 0.531  |  | ---              | ---    |
| ≥63,000                       | 1.09 (0.88-1.35) | 0.411  |  | ---              | ---    |
| Unknown                       | 1.00 (0.56-1.78) | 0.988  |  | ---              | ---    |
| <b>Charlson Deyo Score</b>    |                  |        |  |                  |        |
| 0                             | 1                |        |  | ---              | ---    |
| 1                             | 1.00 (0.82-1.23) | 0.995  |  | ---              | ---    |
| 2                             | 1.26 (0.84-1.87) | 0.264  |  | ---              | ---    |
| 3                             | 0.67 (0.28-1.61) | 0.370  |  | ---              | ---    |
| <b>Primary Site</b>           |                  |        |  |                  |        |
| Extremity                     | 1                |        |  | 1                |        |
| Head and Neck                 | 0.95 (0.66-1.38) | 0.803  |  | 1.10 (0.74-1.63) | 0.652  |
| Thorax                        | 0.68 (0.54-0.86) | 0.001  |  | 0.75 (0.59-0.97) | 0.027  |
| Abdomen/Pelvis                | 0.67 (0.56-0.79) | <0.001 |  | 0.73 (0.61-0.88) | 0.001  |
| Other/NOS                     | 0.27 (0.20-0.36) | <0.001 |  | 0.43 (0.31-0.59) | <0.001 |
| <b>Histology</b>              |                  |        |  |                  |        |
| Unclassified                  | 1                |        |  | 1                |        |
| Undifferentiated Pleomorphic  | 1.77 (1.28-2.45) | 0.001  |  | 1.72 (1.22-2.42) | 0.002  |
| Fibrosarcoma/Myxofibrosarcoma | 2.19 (1.54-3.12) | <0.001 |  | 2.07 (1.42-3.01) | <0.001 |
| Liposarcoma                   | 1.29 (0.97-1.70) | 0.079  |  | 1.31 (0.97-1.76) | 0.075  |
| Leiomyosarcoma                | 1.08 (0.89-1.31) | 0.418  |  | 1.42 (1.15-1.75) | 0.001  |
| Synovial Sarcoma              | 1.67 (1.30-2.15) | <0.001 |  | 1.59 (1.21-2.09) | 0.001  |
| Angiosarcoma                  | 0.76 (0.56-1.03) | 0.079  |  | 1.07 (0.77-1.50) | 0.676  |
| MPNST                         | 2.16 (1.54-3.04) | <0.001 |  | 2.31 (1.61-3.31) | <0.001 |
| <b>Tumor Size</b>             |                  |        |  |                  |        |
| <5 cm                         | 1                |        |  | 1                |        |
| 5.1-10 cm                     | 0.68 (0.53-0.87) | 0.002  |  | 0.61 (0.47-0.79) | <0.001 |
| 10.1-15 cm                    | 0.76 (0.59-0.98) | 0.033  |  | 0.65 (0.50-0.86) | 0.002  |
| >15 cm                        | 0.78 (0.60-1.00) | 0.047  |  | 0.66 (0.51-0.86) | 0.003  |

|                          |                  |        |  |                  |        |
|--------------------------|------------------|--------|--|------------------|--------|
| Unknown                  | 0.30 (0.23-0.39) | <0.001 |  | 0.37 (0.28-0.49) | <0.001 |
| <b>Grade</b>             |                  |        |  |                  |        |
| I                        | 1                |        |  | 1                |        |
| II                       | 0.86 (0.47-1.55) | 0.606  |  | 0.82 (0.45-1.52) | 0.536  |
| III                      | 1.07 (0.64-1.79) | 0.797  |  | 1.08 (0.63-1.85) | 0.780  |
| Unknown                  | 0.45 (0.27-0.76) | 0.003  |  | 0.49 (0.29-0.85) | 0.011  |
| <b>Year of Diagnosis</b> |                  |        |  |                  |        |
| 2004-2007                | 1                |        |  | ---              | ---    |
| 2008-2011                | 1.10 (0.90-1.34) | 0.357  |  | ---              | ---    |
| 2012-2015                | 0.99 (0.81-1.20) | 0.901  |  | ---              | ---    |

**Supplemental Table 3:** Factors associated with receipt of radiotherapy as definitive local treatment.

| Receipt of radiotherapy | Univariate Analysis |         | Multivariate Analysis |         |
|-------------------------|---------------------|---------|-----------------------|---------|
|                         | OR (95% CI)         | P value | OR (95% CI)           | P value |
| <b>Age</b>              |                     |         |                       |         |
| <70 years               | 1                   |         | 1                     |         |
| ≥70 years               | 1.26 (0.98-1.63)    | 0.076   | 1.28 (0.99-1.67)      | 0.064   |
| <b>Gender</b>           |                     |         |                       |         |
| Male                    | 1                   |         | ---                   | ---     |
| Female                  | 0.85 (0.69-1.05)    | 0.136   | ---                   | ---     |
| <b>Race</b>             |                     |         |                       |         |
| Non-Hispanic White      | 1                   |         | ---                   | ---     |
| Non-Hispanic Black      | 0.88 (0.65-1.20)    | 0.427   | ---                   | ---     |
| Hispanic                | 0.71 (0.46-1.09)    | 0.118   | ---                   | ---     |
| Other                   | 1.04 (0.64-1.69)    | 0.880   | ---                   | ---     |
| <b>Facility Area</b>    |                     |         |                       |         |
| Metropolitan            | 1                   |         | ---                   | ---     |
| Urban                   | 0.95 (0.69-1.31)    | 0.741   | ---                   | ---     |

|                                       |                  |       |  |                  |       |
|---------------------------------------|------------------|-------|--|------------------|-------|
| Rural                                 | 0.59 (0.21-1.64) | 0.314 |  | ---              | ---   |
| Unknown                               | 0.90 (0.50-1.60) | 0.712 |  | ---              | ---   |
| <b>Facility Location</b>              |                  |       |  |                  |       |
| East                                  | 1                |       |  | ---              | ---   |
| South                                 | 0.96 (0.69-1.33) | 0.821 |  | ---              | ---   |
| Central                               | 1.07 (0.76-1.50) | 0.699 |  | ---              | ---   |
| West                                  | 1.21 (0.83-1.77) | 0.325 |  | ---              | ---   |
| Unknown                               | 1.05 (0.74-1.49) | 0.802 |  | ---              | ---   |
| <b>Facility Type</b>                  |                  |       |  |                  |       |
| Non-Academic                          | 1                |       |  | ---              | ---   |
| Academic                              | 0.94 (0.75-1.19) | 0.632 |  | ---              | ---   |
| Unknown                               | 0.98 (0.73-1.31) | 0.892 |  | ---              | ---   |
| <b>Insurance</b>                      |                  |       |  |                  |       |
| Commercial                            | 1                |       |  | ---              | ---   |
| Medicare                              | 1.07 (0.84-1.36) | 0.604 |  | ---              | ---   |
| Medicaid                              | 1.06 (0.75-1.48) | 0.752 |  | ---              | ---   |
| Uninsured                             | 0.94 (0.59-1.51) | 0.807 |  | ---              | ---   |
| Other                                 | 1.01 (0.53-1.91) | 0.975 |  | ---              | ---   |
| <b>Distance to Treatment Facility</b> |                  |       |  |                  |       |
| ≤40 miles                             | 1                |       |  | 1                |       |
| >40 miles                             | 0.60 (0.45-0.81) | 0.001 |  | 0.60 (0.45-0.81) | 0.001 |
| Unknown                               | 0.89 (0.38-2.08) | 0.790 |  | 0.87 (0.37-2.03) | 0.740 |
| <b>Zip Code Education Level</b>       |                  |       |  |                  |       |
| ≥21%                                  | 1                |       |  | ---              | ---   |
| 13%-20.9%                             | 1.19 (0.86-1.65) | 0.290 |  | ---              | ---   |
| 7%-12.9%                              | 1.09 (0.79-1.49) | 0.611 |  | ---              | ---   |
| <7%                                   | 1.12 (0.80-1.56) | 0.519 |  | ---              | ---   |



|                               |                  |        |  |                  |       |
|-------------------------------|------------------|--------|--|------------------|-------|
| Unknown                       | 1.06 (0.44-2.56) | 0.889  |  | ---              | ---   |
| <b>Zip Code Income Level</b>  |                  |        |  |                  |       |
| <38,000                       | 1                |        |  | ---              | ---   |
| 38,000-47,999                 | 1.06 (0.75-1.48) | 0.750  |  | ---              | ---   |
| 48,000-62,999                 | 1.14 (0.82-1.57) | 0.432  |  | ---              | ---   |
| ≥63,000                       | 1.10 (0.80-1.51) | 0.551  |  | ---              | ---   |
| Unknown                       | 0.99 (0.41-2.38) | 0.989  |  | ---              | ---   |
| <b>Charlson Deyo Score</b>    |                  |        |  |                  |       |
| 0                             | 1                |        |  | ---              | ---   |
| 1                             | 0.80 (0.58-1.10) | 0.165  |  | ---              | ---   |
| 2                             | 0.66 (0.32-1.35) | 0.254  |  | ---              | ---   |
| 3                             | 1.24 (0.43-3.53) | 0.690  |  | ---              | ---   |
| <b>Primary Site</b>           |                  |        |  |                  |       |
| Extremity                     | 1                |        |  | 1                |       |
| Head and Neck                 | 1.22 (0.73-2.06) | 0.447  |  | 1.37 (0.80-2.35) | 0.251 |
| Thorax                        | 0.99 (0.71-1.38) | 0.939  |  | 1.00 (0.71-1.42) | 0.988 |
| Abdomen/Pelvis                | 0.82 (0.64-1.05) | 0.111  |  | 0.90 (0.69-1.16) | 0.402 |
| Other/NOS                     | 0.62 (0.42-0.91) | 0.015  |  | 0.70 (0.46-1.05) | 0.085 |
| <b>Histology</b>              |                  |        |  |                  |       |
| Unclassified                  | 1                |        |  | 1                |       |
| Undifferentiated Pleomorphic  | 0.71 (0.41-1.23) | 0.219  |  | 0.67 (0.39-1.17) | 0.162 |
| Fibrosarcoma/Myxofibrosarcoma | 0.67 (0.36-1.27) | 0.220  |  | 0.68 (0.36-1.29) | 0.243 |
| Liposarcoma                   | 0.92 (0.62-1.38) | 0.687  |  | 0.95 (0.63-1.43) | 0.799 |
| Leiomyosarcoma                | 0.58 (0.43-0.78) | <0.001 |  | 0.61 (0.44-0.82) | 0.001 |
| Synovial Sarcoma              | 0.96 (0.66-1.39) | 0.812  |  | 0.97 (0.66-1.41) | 0.863 |
| Angiosarcoma                  | 0.79 (0.52-1.19) | 0.255  |  | 0.83 (0.54-1.27) | 0.398 |
| MPNST                         | 0.61 (0.32-1.14) | 0.119  |  | 0.66 (0.35-1.25) | 0.205 |

|                          |                  |       |  |                  |       |
|--------------------------|------------------|-------|--|------------------|-------|
| <b>Tumor Size</b>        |                  |       |  |                  |       |
| <5 cm                    | 1                |       |  | 1                |       |
| 5.1-10 cm                | 1.60 (1.05-2.44) | 0.028 |  | 1.62 (1.06-2.48) | 0.027 |
| 10.1-15 cm               | 1.51 (0.98-2.34) | 0.063 |  | 1.56 (1.00-2.43) | 0.052 |
| >15 cm                   | 1.31 (0.85-2.04) | 0.223 |  | 1.40 (0.89-2.20) | 0.145 |
| Unknown                  | 1.15 (0.74-1.77) | 0.534 |  | 1.24 (0.80-1.93) | 0.337 |
| <b>Grade</b>             |                  |       |  |                  |       |
| I                        | 1                |       |  | ---              | ---   |
| II                       | 2.23 (0.75-6.65) | 0.149 |  | ---              | ---   |
| III                      | 1.80 (0.65-4.97) | 0.260 |  | ---              | ---   |
| Unknown                  | 1.62 (0.58-4.50) | 0.354 |  | ---              | ---   |
| <b>Year of Diagnosis</b> |                  |       |  |                  |       |
| 2004-2007                | 1                |       |  | ---              | ---   |
| 2008-2011                | 0.85 (0.64-1.14) | 0.273 |  | ---              | ---   |
| 2012-2015                | 0.86 (0.65-1.13) | 0.285 |  | ---              | ---   |

**Supplemental Table 4:** Factors associated with receipt of surgery and radiotherapy as definitive local treatment.

| Receipt of Surgery + RT | Univariate Analysis |         | Multivariate Analysis |         |
|-------------------------|---------------------|---------|-----------------------|---------|
|                         | OR (95% CI)         | P value | OR (95% CI)           | P value |
| <b>Age</b>              |                     |         |                       |         |
| <70 years               | 1                   |         | 1                     |         |
| ≥70 years               | 0.76 (0.56-1.04)    | 0.086   | 0.92 (0.62-1.38)      | 0.698   |
| <b>Gender</b>           |                     |         |                       |         |
| Male                    | 1                   |         | ---                   | ---     |
| Female                  | 0.98 (0.78-1.22)    | 0.840   | ---                   | ---     |
| <b>Race</b>             |                     |         |                       |         |
| Non-Hispanic White      | 1                   |         | ---                   | ---     |
| Non-Hispanic Black      | 1.02 (0.75-1.40)    | 0.896   | ---                   | ---     |

|                                       |                  |        |  |                  |       |
|---------------------------------------|------------------|--------|--|------------------|-------|
| Hispanic                              | 1.07 (0.72-1.58) | 0.755  |  | ---              | ---   |
| Other                                 | 0.88 (0.50-1.54) | 0.649  |  | ---              | ---   |
| <b>Facility Area</b>                  |                  |        |  |                  |       |
| Metropolitan                          | 1                |        |  | ---              | ---   |
| Urban                                 | 1.20 (0.88-1.64) | 0.252  |  | ---              | ---   |
| Rural                                 | 0.51 (0.16-1.63) | 0.254  |  | ---              | ---   |
| Unknown                               | 0.78 (0.41-1.50) | 0.462  |  | ---              | ---   |
| <b>Facility Location</b>              |                  |        |  |                  |       |
| East                                  | 1                |        |  | 1                |       |
| South                                 | 0.93 (0.65-1.35) | 0.708  |  | 0.97 (0.65-1.44) | 0.873 |
| Central                               | 1.42 (0.99-2.03) | 0.060  |  | 1.45 (0.99-2.13) | 0.057 |
| West                                  | 1.11 (0.72-1.71) | 0.647  |  | 1.13 (0.71-1.79) | 0.606 |
| Unknown                               | 1.64 (1.14-2.36) | 0.008  |  | 1.54 (0.96-2.48) | 0.075 |
| <b>Facility Type</b>                  |                  |        |  |                  |       |
| Non-Academic                          | 1                |        |  | 1                |       |
| Academic                              | 1.33 (1.03-1.72) | 0.030  |  | 1.04 (0.78-1.38) | 0.783 |
| Unknown                               | 1.73 (1.29-2.33) | <0.001 |  | .                | .     |
| <b>Insurance</b>                      |                  |        |  |                  |       |
| Commercial                            | 1                |        |  | 1                |       |
| Medicare                              | 0.74 (0.57-0.97) | 0.027  |  | 0.87 (0.61-1.22) | 0.412 |
| Medicaid                              | 0.78 (0.54-1.12) | 0.181  |  | 0.59 (0.40-0.86) | 0.007 |
| Uninsured                             | 0.77 (0.46-1.27) | 0.299  |  | 0.66 (0.39-1.12) | 0.123 |
| Other                                 | 0.51 (0.22-1.17) | 0.110  |  | 0.46 (0.19-1.07) | 0.072 |
| <b>Distance to Treatment Facility</b> |                  |        |  |                  |       |
| ≤40 miles                             | 1                |        |  | 1                |       |
| >40 miles                             | 1.40 (1.09-1.79) | 0.009  |  | 1.19 (0.91-1.56) | 0.212 |
| Unknown                               | 0.77 (0.28-2.14) | 0.620  |  | 0.59 (0.21-1.70) | 0.332 |

|                                 |                  |        |  |                  |        |
|---------------------------------|------------------|--------|--|------------------|--------|
| <b>Zip Code Education Level</b> |                  |        |  |                  |        |
| ≥21%                            | 1                |        |  | ---              | ---    |
| 13%-20.9%                       | 1.02 (0.73-1.43) | 0.902  |  | ---              | ---    |
| 7%-12.9%                        | 1.01 (0.73-1.40) | 0.947  |  | ---              | ---    |
| <7%                             | 0.96 (0.68-1.35) | 0.804  |  | ---              | ---    |
| Unknown                         | 0.70 (0.25-1.98) | 0.501  |  | ---              | ---    |
| <b>Zip Code Income Level</b>    |                  |        |  |                  |        |
| <38,000                         | 1                |        |  | ---              | ---    |
| 38,000-47,999                   | 0.92 (0.65-1.29) | 0.616  |  | ---              | ---    |
| 48,000-62,999                   | 0.99 (0.72-1.37) | 0.967  |  | ---              | ---    |
| ≥63,000                         | 0.79 (0.57-1.10) | 0.158  |  | ---              | ---    |
| Unknown                         | 0.78 (0.30-1.99) | 0.599  |  | ---              | ---    |
| <b>Charlson Deyo Score</b>      |                  |        |  |                  |        |
| 0                               | 1                |        |  | ---              | ---    |
| 1                               | 0.93 (0.67-1.28) | 0.648  |  | ---              | ---    |
| 2                               | 0.65 (0.30-1.40) | 0.270  |  | ---              | ---    |
| 3                               | .                | .      |  | ---              | ---    |
| <b>Primary Site</b>             |                  |        |  |                  |        |
| Extremity                       | 1                |        |  | 1                |        |
| Head and Neck                   | 0.69 (0.40-1.17) | 0.169  |  | 0.95 (0.54-1.67) | 0.845  |
| Thorax                          | 0.32 (0.21-0.48) | <0.001 |  | 0.37 (0.24-0.57) | <0.001 |
| Abdomen/Pelvis                  | 0.25 (0.19-0.34) | <0.001 |  | 0.29 (0.21-0.39) | <0.001 |
| Other/NOS                       | 0.08 (0.04-0.17) | <0.001 |  | 0.15 (0.07-0.32) | <0.001 |
| <b>Histology</b>                |                  |        |  |                  |        |
| Unclassified                    | 1                |        |  | 1                |        |
| Undifferentiated Pleomorphic    | 1.81 (1.15-2.86) | 0.011  |  | 1.58 (0.98-2.55) | 0.062  |
| Fibrosarcoma/Myxofibrosarcoma   | 1.89 (1.14-3.13) | 0.013  |  | 1.64 (0.97-2.79) | 0.067  |

|                          |                  |        |  |                  |       |
|--------------------------|------------------|--------|--|------------------|-------|
| Liposarcoma              | 1.72 (1.18-2.52) | 0.005  |  | 1.80 (1.20-2.70) | 0.005 |
| Leiomyosarcoma           | 0.60 (0.43-0.85) | 0.004  |  | 0.89 (0.61-1.29) | 0.544 |
| Synovial Sarcoma         | 1.81 (1.27-2.58) | 0.001  |  | 1.38 (0.94-2.02) | 0.098 |
| Angiosarcoma             | 0.56 (0.33-0.97) | 0.040  |  | 0.96 (0.54-1.71) | 0.883 |
| MPNST                    | 1.41 (0.83-2.40) | 0.206  |  | 1.35 (0.77-2.37) | 0.299 |
| <b>Tumor Size</b>        |                  |        |  |                  |       |
| <5 cm                    | 1                |        |  | 1                |       |
| 5.1-10 cm                | 1.37 (0.92-2.05) | 0.125  |  | 1.30 (0.85-1.98) | 0.225 |
| 10.1-15 cm               | 1.41 (0.93-2.14) | 0.104  |  | 1.23 (0.79-1.90) | 0.359 |
| >15 cm                   | 1.33 (0.88-2.02) | 0.174  |  | 1.07 (0.69-1.67) | 0.753 |
| Unknown                  | 0.30 (0.18-0.50) | <0.001 |  | 0.42 (0.25-0.72) | 0.001 |
| <b>Grade</b>             |                  |        |  |                  |       |
| I                        | 1                |        |  | 1                |       |
| II                       | 1.11 (0.46-2.71) | 0.815  |  | 1.00 (0.39-2.57) | 0.999 |
| III                      | 1.06 (0.48-2.35) | 0.879  |  | 0.91 (0.39-2.13) | 0.831 |
| Unknown                  | 0.54 (0.24-1.21) | 0.132  |  | 0.59 (0.25-1.39) | 0.227 |
| <b>Year of Diagnosis</b> |                  |        |  |                  |       |
| 2004-2007                | 1                |        |  | 1                |       |
| 2008-2011                | 0.92 (0.68-1.23) | 0.555  |  | 0.95 (0.70-1.29) | 0.742 |
| 2012-2015                | 0.74 (0.55-0.98) | 0.039  |  | 0.80 (0.59-1.09) | 0.152 |
